# Supplementary material
Source: Springer Nature journal article supplement (https://www.springermedizin.de/resource/supplementary/12913_2007_577_MOESM5_ESM.pdf/9535904)
Supplement: MOESM5 [file 9535904]

Table 4: interview themes for ethical evaluation

|                                                        |                                                                                                                                                                                                                                                                                                                                                                                                                                                                                                                                                                                                                                                                                                                                                                                                            |
|--------------------------------------------------------|------------------------------------------------------------------------------------------------------------------------------------------------------------------------------------------------------------------------------------------------------------------------------------------------------------------------------------------------------------------------------------------------------------------------------------------------------------------------------------------------------------------------------------------------------------------------------------------------------------------------------------------------------------------------------------------------------------------------------------------------------------------------------------------------------------|
| <p>1. Expectations before the consultations about:</p> | <p>the role of the patient (e.g. active/passive);</p> <p>the role of the practice nurse (e.g. guiding, informative, clarifying, reflecting);</p> <p>the gain from the consultations (e.g. information, becoming aware, getting attention, reflection and a motivated decision, guiding towards a decision).</p>                                                                                                                                                                                                                                                                                                                                                                                                                                                                                            |
| <p>2. Experiences with the consultations</p>           | <p>Understanding the situation.</p> <p>What had the patient picked up from the consultations?</p> <p>What was the role of the tools in this understanding?</p> <p>How was the patient involved in the consultations?</p> <p>Active participation in the discussion.</p> <p>Personal involvement in the topic.</p> <p>Contribution to the decisions that were made.</p> <p>How did the nurse approach the patient (e.g. attentive, open to the patient's opinion, steering, informative, giving his/her own view)?</p> <p>What was the impact of the consultation for the patient's personal life and well-being; as regards clear decisions, goals and a plan?</p> <p>The tools of the intervention</p> <p>What did the tools mean to the patient?</p> <p>Was anything missing from the consultations?</p> |
| <p>3. Preferences for</p>                              | <p>about the patient's role;</p>                                                                                                                                                                                                                                                                                                                                                                                                                                                                                                                                                                                                                                                                                                                                                                           |

|                      |                                                                                |
|----------------------|--------------------------------------------------------------------------------|
| future consultations | about role of the practice nurse;                                              |
|                      | about the significance of the consultation. When is a consultation successful? |
